# Supplementary material for: Weight for gestational age and metabolically healthy obesity in adults from the Haguenau cohort
Source: PubMed Central journal article supplement — BMJ Open. 2016 Aug 31;6(8):e011367. doi: 10.1136/bmjopen-2016-011367 (PMC5013421; doi:10.1136/bmjopen-2016-011367), 2016-08-31
Supplement: bmjopen-2016-011367supp.pdf [file bmjopen-2016-011367supp.pdf]

Supplementary data

Univariate and multivariate adjusted Relative Risks for MUHO in obese SGA *versus* obese AGA categories (additionally adjusting for socioeconomic status and physical activity)

|                          | MUHO             | MUHO             |
|--------------------------|------------------|------------------|
|                          | RR (95% CI)      | RR (95% CI)      |
| <b>Obese at 30 years</b> | Univariate       | Multivariate     |
| AGA obese (n=57)         | 1 (ref)          | 1 (ref)          |
| SGA obese (n=72)         | 1.30 (1.03-1.63) | 1.29 (1.02-1.62) |
